# Supplementary material
Source: PubMed Central journal article supplement (PMC2777930)

## **Supplementary Materials**

### **MOVIE LEGENDS:**

These are QuickTime format movie files (.mov extensions). View using the Apple QuickTime.

**Movie1:** MT and ER dynamics in growth cone of Aplysia bag cell neuron in CA Rac1 backgrounds. FSM time lapse of MT and ER dynamics in a growth cone injected with CA Rac1 showing DIC (upper left); MT (upper right); ER (lower left) and merge of MT (red) and ER (green) (lower right). Bar: 10 $\mu$ m; 12 s interval; elapsed time 120 s.

**Movie2:** MT and ER dynamics in growth cone of Aplysia bag cell neuron in DN Rac1 backgrounds. FSM time lapse of MT and ER dynamics in a growth cone injected with DN Rac1 showing DIC (upper left); MT (upper right); ER (lower left) and merge of MT (red) and ER (green) (lower right). Bar: 10 $\mu$ m; 12 s interval; elapsed time 120 s.

**Movie3:** 5-HT (10 $\mu$ M) triggers Ca<sup>2+</sup> elevation in growth cone in CA Rac1 backgrounds. Ca<sup>2+</sup> ratio image is coded by pseudo-colors in linear scale (see scale bar). Bar: 10 $\mu$ m; 20 s interval; elapsed time: 12 min.

**Movie4:** Taxol alters ER distribution in growth cone in CA Rac1 backgrounds. Left: Before; Right: 25 min in taxol (0.1  $\mu$ M); Bar: 10 $\mu$ m; 12 s interval; elapsed time: 60 s.

**Movie5:** Taxol alters the spatial profile of 5-HT-evoked Ca<sup>2+</sup> response in growth cone in CA Rac1 backgrounds. CA Rac1 injected neuron was pretreated with taxol (0.1  $\mu$ M) for 20 min and then stimulated by 5-HT (10  $\mu$ M) with the continued presence of taxol. Growth cone area is outlined by white line. Ca<sup>2+</sup> ratio image is

coded by pseudo-colors in linear scale (see scale bar). Bar: 10 $\mu$ m; 10 s interval; elapsed time: 10 min.

#### **SUPPLEMENTARY FIGURE LEGENDS:**

**Figure S1 Microtubule dynamics assessed with FSM.** Two examples of single microtubule entering the P domain via plus end assembly (A and B) and an example of a microtubule catastrophe (B). Note microtubule transport due to microtubule association with retrograde actin flow (Schaefer *et al.*, 2002), which results in the microtubule kinking evident in the last frame of (A). Blue line: speckle at microtubule plus end; Yellow line: internal reference speckle.

**Figure S2 Immunocytochemistry of actin filament and ER distribution in a growth cone.** Left: actin; Right: ER. Red line: filopodial ends. Bar = 10  $\mu$ m.

**Figure S3 Immunocytochemistry of actin filament and microtubule distribution in a growth cone in CA Rac1 backgrounds.** Left: Actin; Middle: Microtubule; Right: Merge of actin (red) and microtubule (green). Red line, green line and blue line: reference lines as showed in Figure 1 D. Bar = 10  $\mu$ m.

**Figure S4 Vinblastine alters the pattern of 5-HT-evoked Ca<sup>2+</sup> release in CA Rac1 backgrounds.** A) CA Rac1 injected neurons were pretreated with vinblastine (25 nM) for 20 min, followed by 5-HT (10 $\mu$ M) exposure with the continued presence of vinblastine. DIC (left) and Ca<sup>2+</sup> (right) kymographs sampled from the region as indicated by white line in Figure 1 D before and after addition of 5-HT. Data acquired at 20 sec intervals. Blue line (75%P): three quarters of P-domain breadth from the red line; Red line (C-P interface): interface between C-domain and P-domain; Black line indicates 5-HT addition. P: P domain; C: C domain. Ca<sup>2+</sup> kymograph is coded by pseudo-colors in linear scale (see scale bar). Bottom graph in A: the time course of 5-HT-evoked Ca<sup>2+</sup> response sampled from blue line and red line (see above). B) Summary of  $\Delta F/F_0$

plots recorded in the entire C-domain (red line) or P-domain (blue line) of growth cones pretreated with vinblastine (25 nM, 20-30 min) to quantify  $\text{Ca}^{2+}$  response to 5-HT (10 $\mu\text{M}$ ) over time in CA Rac1 backgrounds. N=5. N denotes the number of growth cones tested. Values are expressed as mean  $\pm$  SEM. Black bar shows 5-HT presence. C) Vinblastine (25 nM) effects on ER distribution in growth cones in CA Rac1 backgrounds. Top: Actin staining; Bottom: ER staining. Left: Vinblastine treatment for 20 min; Right: Vinblastine treatment for 30 min. Red line: filopodial ends. Bar = 10  $\mu\text{m}$ .

**Figure S5 Verification of ROS assay.** DIC and ROS kymographs obtained from a control growth cone and sampled from the region as indicated by white line in Figure 1 D before and after  $\text{H}_2\text{O}_2$  (10 $\mu\text{M}$ ) addition. Data acquired at 10 sec intervals. Black line indicates  $\text{H}_2\text{O}_2$  addition. P: P domain; C: C domain. ROS kymograph is coded by pseudo-colors in linear scale (see scale bar). Right: graph showing ROS level increase after addition of  $\text{H}_2\text{O}_2$  sampled from the red line in kymograph.

**Figure S6 ROS derived from Rac1 activation promotes 5-HT-evoked  $\text{Ca}^{2+}$  response.** A and B) DIC (left) and  $\text{Ca}^{2+}$  (right) kymographs obtained from a line across GC (shown as the white line in Figure 1 D) in CA Rac1 backgrounds. Neurons were pretreated with NAC (1mM, 30min (A)) or Apocynin (1mM, 45min (B)) followed by 5-HT (10 $\mu\text{M}$ ) exposure in the continued presence of NAC or Apocynin, respectively. Data acquired at 10 sec intervals. Black line indicates 5-HT addition. P: P domain; C: C domain.  $\text{Ca}^{2+}$  kymograph is coded by pseudo-colors in linear scale (see scale bars). C, D and E) DIC (left) and  $\text{Ca}^{2+}$  (right) kymographs from DN Rac1 injected cells before and after 5-HT (10 $\mu\text{M}$ ) addition. Cells were pretreated with  $\text{H}_2\text{O}_2$  (10 $\mu\text{M}$ ) in the absence (D) or presence (E) of XeC (20  $\mu\text{M}$ ) for 20 min and treated continuously during 5-HT stimulation. Data acquired at 20sec or 10 sec intervals for (C and D) and (E), respectively. Black line indicates 5-HT addition. P: P domain; C: C domain.  $\text{Ca}^{2+}$  kymograph is coded by pseudo-colors in linear scale (see scale bars).

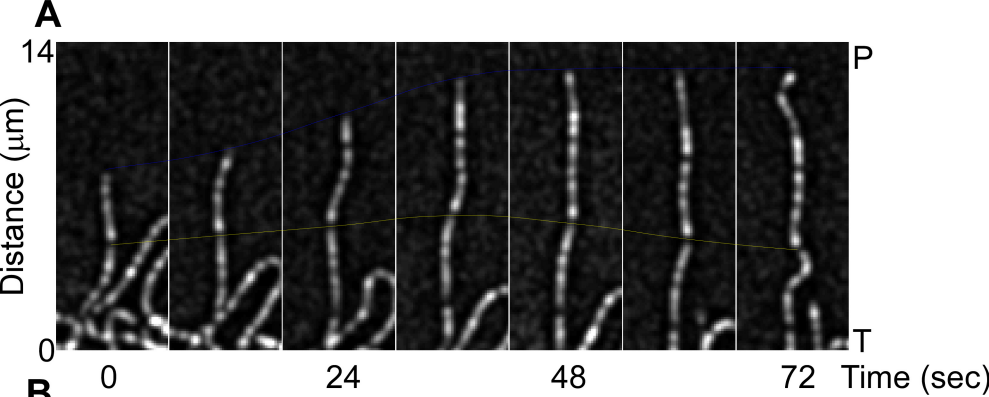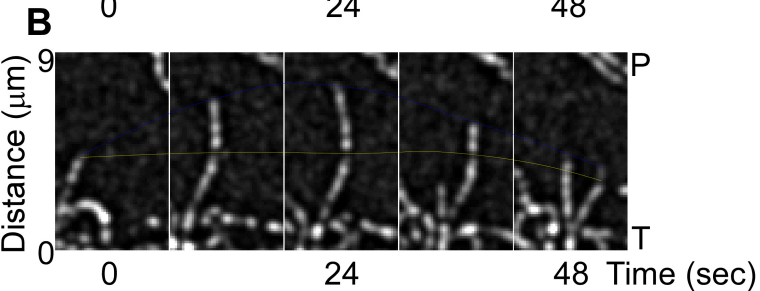

Actin

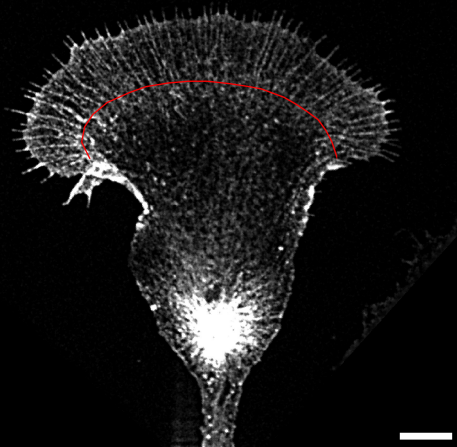

ER

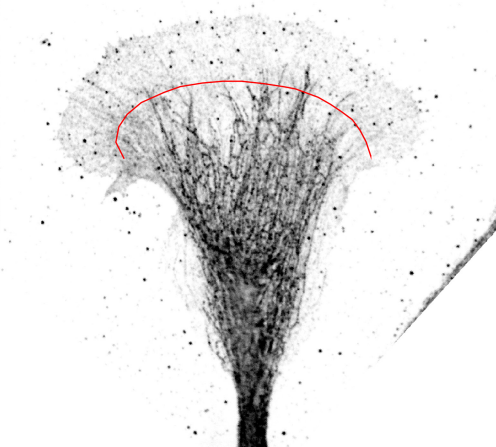

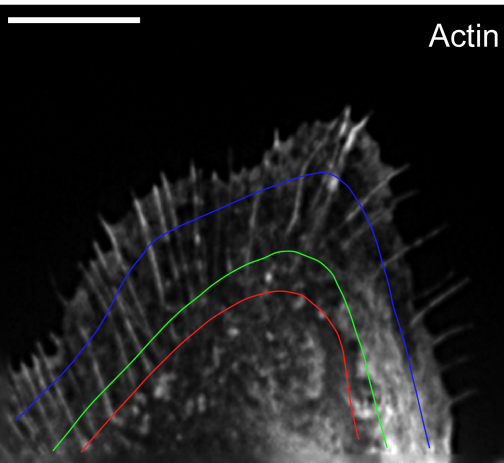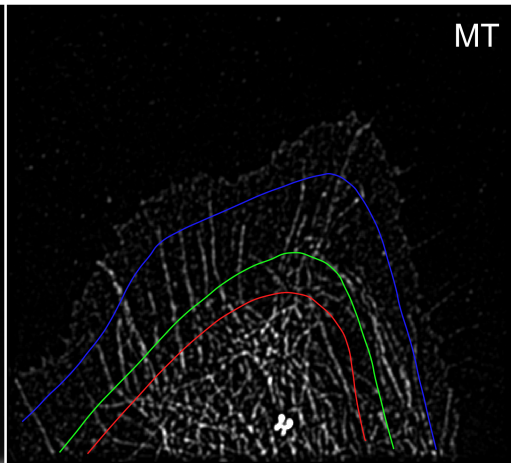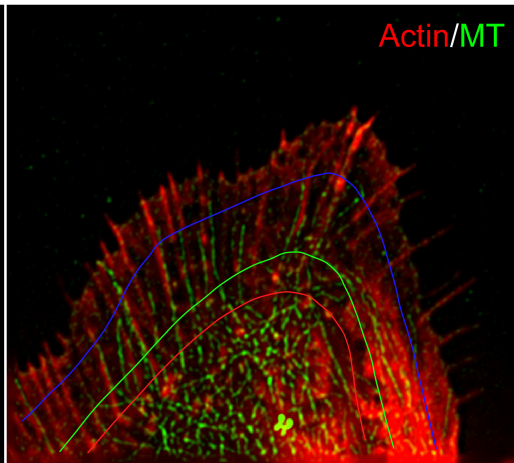

**A** CA Rac1 + Vinblastine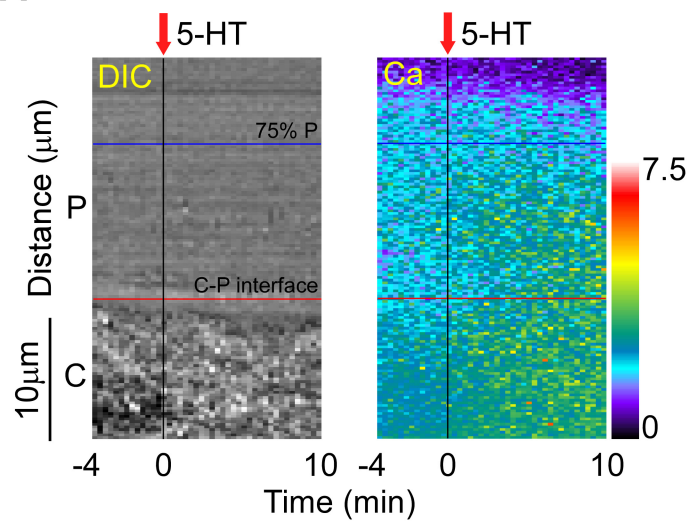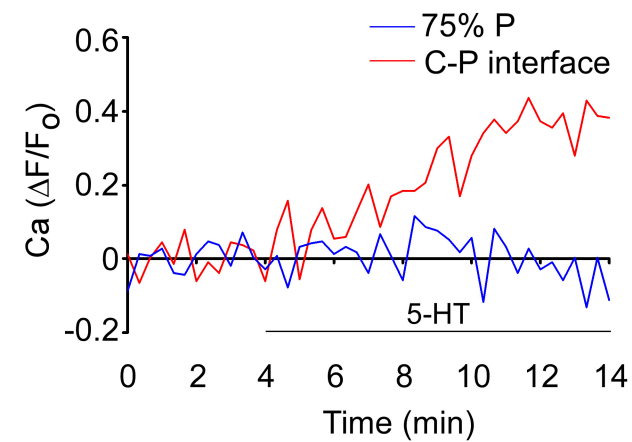**B**

## CA Rac1 + Vinblastine

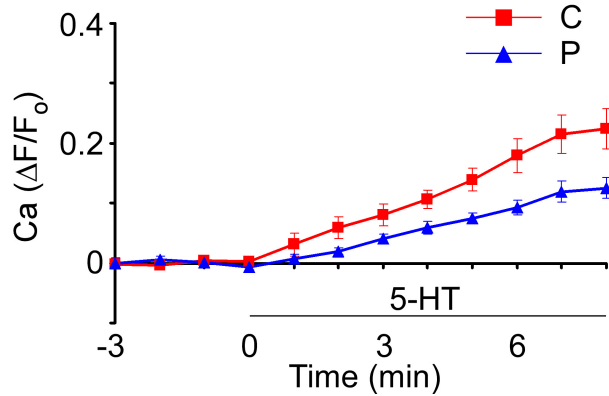**C**

## CA Rac1 + Vinblastine

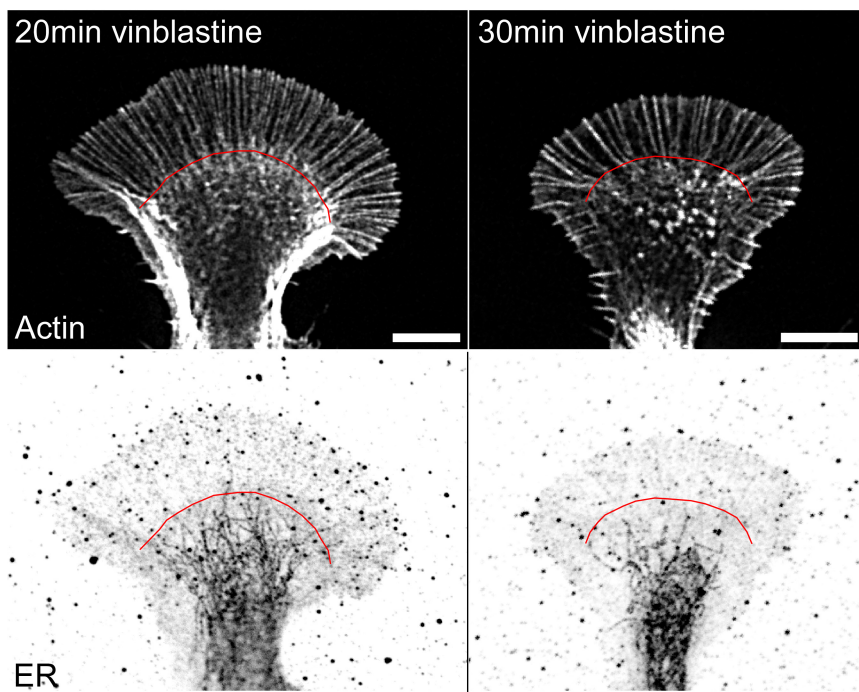

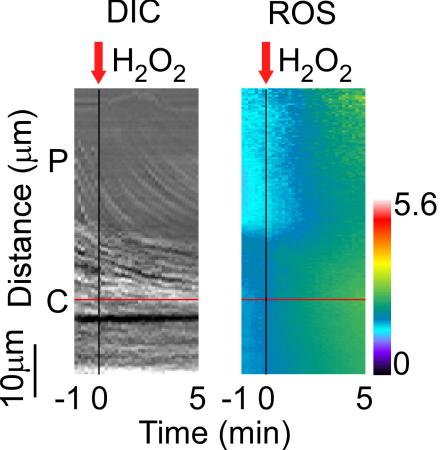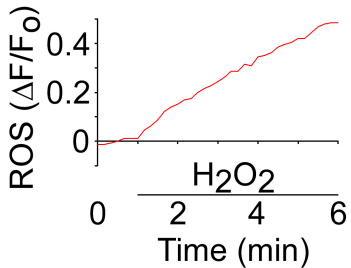



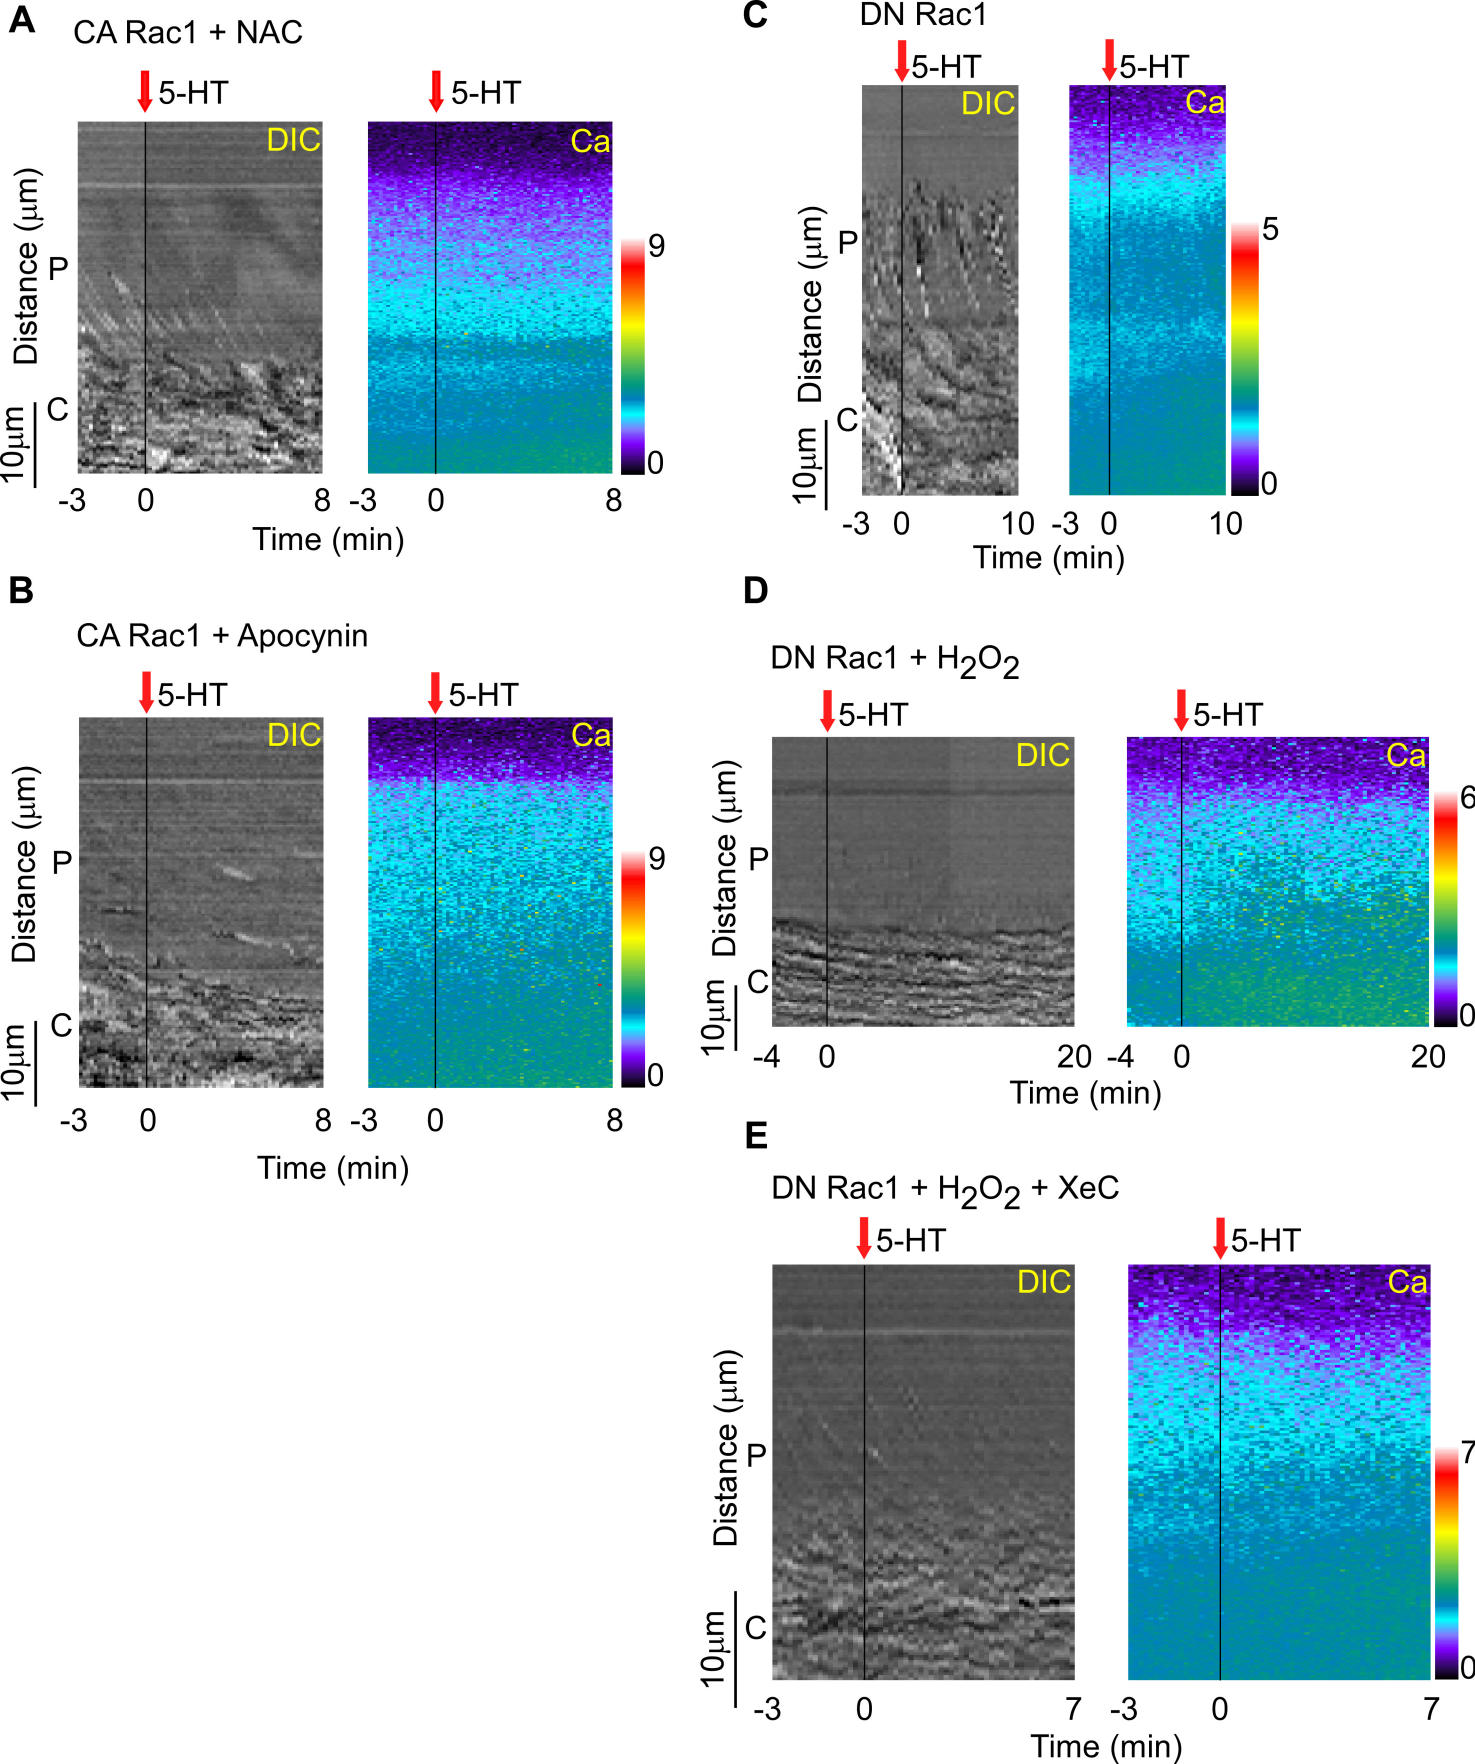

Supplement: E08-07-0730_1.pdf [file E08-07-0730_1.pdf]
